# Supplementary material
Source: publisher site journal article supplement (http://www.kjim.org/upload/media/kjim-2020-180-suppl3.pdf)
Supplement: Supplementary file 1 [file kjim-2020-180-suppl3.pdf]

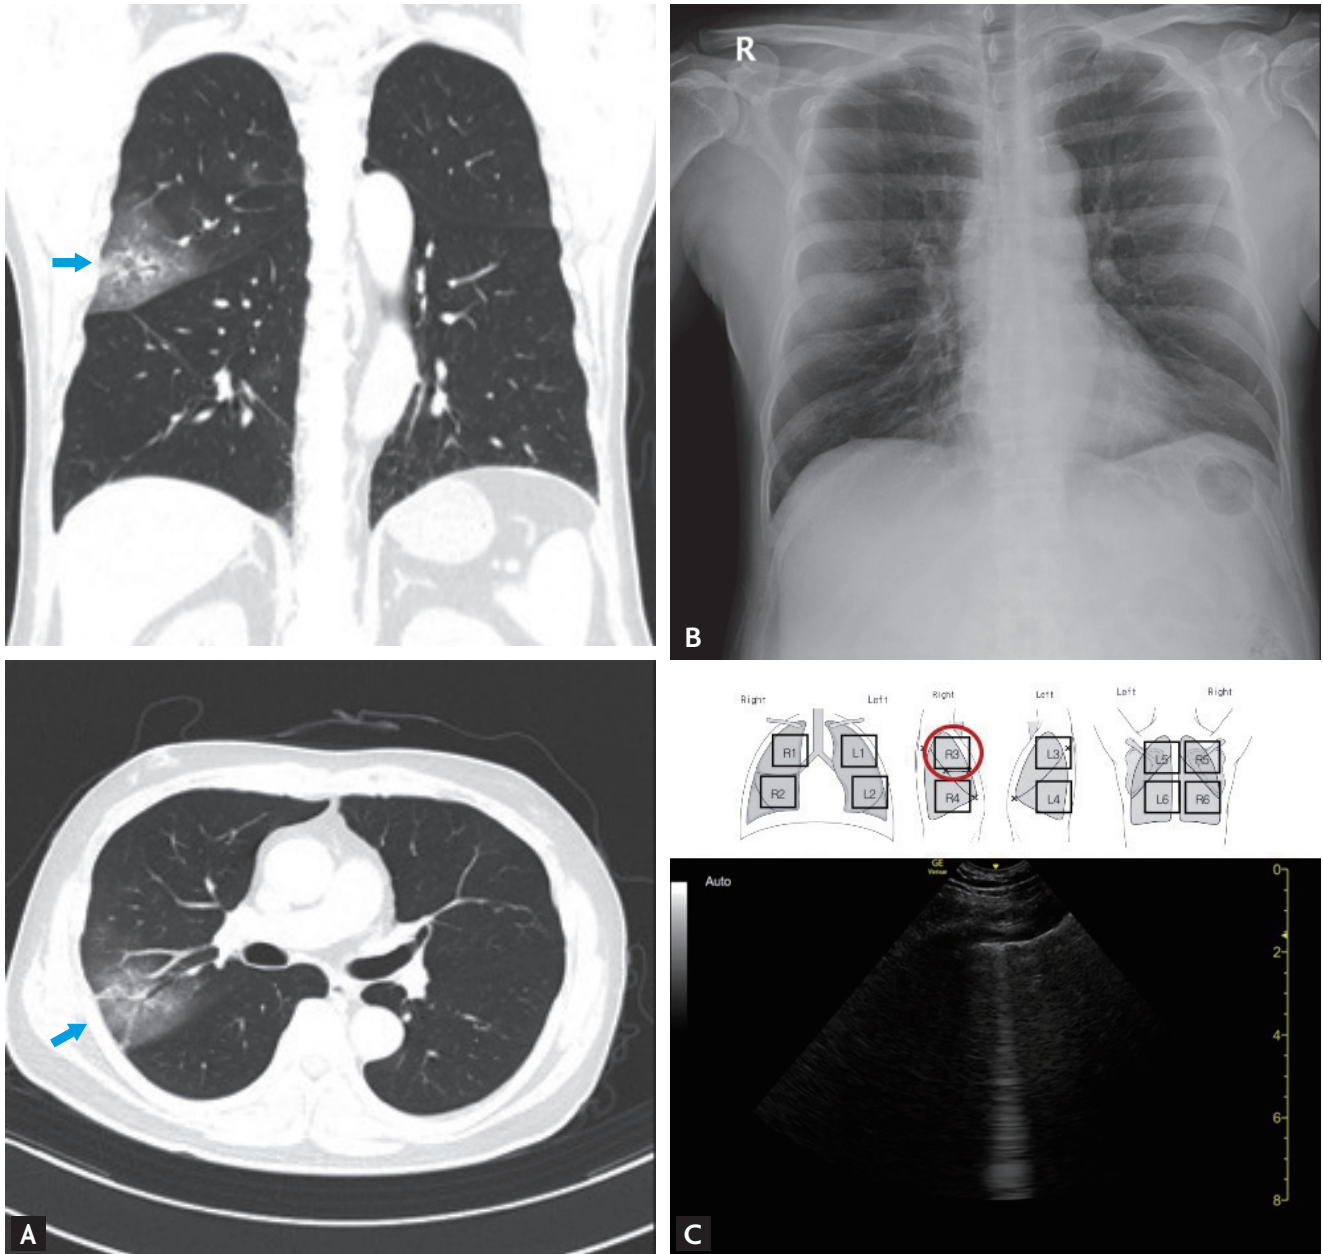

**Supplementary Figure 3.** Case 2: The chest computed tomography (A) scan shows ground-glass opacity (blue arrow) in the right upper lung field (R<sub>3</sub>), chest X-ray (B) showed normal; however, lung ultrasound showed definite B-lines (C).
